# Supplementary material for: A pair of homochiral trinuclear Zn(ii) clusters exhibiting unusual ferroelectric behaviour at high temperature
Source: Royal Society of Chemistry journal article supplement (doi:10.1039/c9ce00034h), 2019-01-01
Supplement: c9ce00034h1.pdf [file c9ce00034h1.pdf]

## **A Pair of Homochiral Trinuclear Zn (II) Clusters Exhibiting Unusual Ferroelectric Behavior at High-Temperature**

Meiying Liu, Haiyang Yu and Zhiliang Liu\*

Inner Mongolia Key Laboratory of Chemistry and Physics of Rare Earth Materials,  
School of Chemistry and Chemical Engineering, Inner Mongolia University, Hohhot  
010021, P.R. China. \*Corresponding author.

E-mail: cezliu@imu.edu.cn.

Fax/Tel: +86-471-4994375.

### **Electronic Supplementary Information**

#### **Content**

**Table S1:** Crystallographic data and structure refinement for **R-1** and **S-1**

**Table S2:** Main bond lengths (Å) for **R-1** and **S-1**

**Table S3:** Main bond angles (°) for **R-1** and **S-1**

**Fig. S1:** IR spectra for **R-1** and **S-1** at RT in KBr pellets

**Fig. S2:** CD spectra for (R)-HL and (S)-HL solution ( $1 \times 10^{-2}$  mmol/mL, CH<sub>3</sub>OH)

**Fig. S3:** Thermogravimetric curves for **R-1**

**Fig. S4:** DSC curves for **R-1**

**Fig. S5:** The leakage current curves for **R-1** at 1200 V under different temperature

**Fig. S6:** The fluorescence spectra of (S)-HL (a) and (R)-HL (b) at room temperature ( $1 \times 10^{-5}$  M)

**Fig. S7:** The solid-state fluorescence spectra of **S-1** (a) and **R-1** (b) at room temperature

**Fig.S8:** The fluorescent lifetime for **R-1** and **S-1**

**Table S1** Crystallographic data and structure refinement for **R-1** and **S-1**

| Name                                    | <b>S-1</b>                                                                     | <b>R-1</b>                                                                     |
|-----------------------------------------|--------------------------------------------------------------------------------|--------------------------------------------------------------------------------|
| Empirical formula                       | C <sub>40</sub> H <sub>44</sub> N <sub>2</sub> O <sub>12</sub> Zn <sub>3</sub> | C <sub>40</sub> H <sub>44</sub> N <sub>2</sub> O <sub>12</sub> Zn <sub>3</sub> |
| Formula weight                          | 940.88                                                                         | 940.88                                                                         |
| Temperature/K                           | 293.15                                                                         | 173                                                                            |
| Wavelength/Å                            | 0.71073                                                                        | 0.71073                                                                        |
| Crystal system                          | Monoclinic                                                                     | Monoclinic                                                                     |
| space group                             | P2 <sub>1</sub>                                                                | P2 <sub>1</sub>                                                                |
| a/Å                                     | 10.5958(17)                                                                    | 10.4740(5)                                                                     |
| b/Å                                     | 17.944(2)                                                                      | 17.8233(9)                                                                     |
| c/Å                                     | 11.8027(19)                                                                    | 11.7087(5)                                                                     |
| α/°                                     | 90                                                                             | 90                                                                             |
| β/°                                     | 107.323(6)                                                                     | 107.0091(13)                                                                   |
| γ/°                                     | 90                                                                             | 90                                                                             |
| Volume/Å <sup>3</sup>                   | 2142.2(6)                                                                      | 2090.18(17)                                                                    |
| Z                                       | 2                                                                              | 2                                                                              |
| ρ <sub>calc</sub> /mg/cm <sup>3</sup>   | 1.459                                                                          | 1.495                                                                          |
| Absorption coefficient/mm <sup>-1</sup> | 1.727                                                                          | 1.770                                                                          |
| F(000)                                  | 968                                                                            | 968                                                                            |
| Crystal size/ mm <sup>3</sup>           | 0.03 x 0.02 x 0.01                                                             | 0.03 x 0.02 x 0.01                                                             |
| Theta range for data collection/°       | 2.90 to 25.20                                                                  | 2.92 to 28.32                                                                  |
| Index ranges                            | -12 ≤ h ≤ 12                                                                   | -13 ≤ h ≤ 13                                                                   |
|                                         | -21 ≤ k ≤ 21                                                                   | -23 ≤ k ≤ 23                                                                   |
|                                         | -14 ≤ l ≤ 14                                                                   | -15 ≤ l ≤ 15                                                                   |
| Reflections collected                   | 31417                                                                          | 48441                                                                          |
| Independent reflections                 | 7681 [R(int) = 0.0259]                                                         | 10317 [R(int) = 0.0208]                                                        |
| Completeness to theta = 25.20           | 99.8%                                                                          | 99.6%                                                                          |
| Max. and min. transmission              | 0.7457 and 0.6050                                                              | 0.7457 and 0.6158                                                              |
| Refinement method                       | Full-matrix least-squares on F <sup>2</sup>                                    | Full-matrix least-squares on F <sup>2</sup>                                    |
| Data/restraints / parameters            | 7681 / 1 / 522                                                                 | 10317 / 1 / 522                                                                |
| Goodness-of-fit on F <sup>2</sup>       | 1.069                                                                          | 1.059                                                                          |
| Final R indices [I > 2σ(I)]             | R <sub>1</sub> = 0.0658, wR <sub>2</sub> = 0.1942                              | R <sub>1</sub> = 0.0600, wR <sub>2</sub> = 0.1833                              |
| R indices (all data)                    | R <sub>1</sub> = 0.0692, wR <sub>2</sub> = 0.1991                              | R <sub>1</sub> = 0.0621, wR <sub>2</sub> = 0.1860                              |
| Absolute structure parameter            | 0.08(2)                                                                        | 0.068(15)                                                                      |

|                                             |              |              |
|---------------------------------------------|--------------|--------------|
| Largest diff. peak/hole / e Å <sup>-3</sup> | 0.583/-2.686 | 0.890/-3.823 |
|---------------------------------------------|--------------|--------------|

**Table S2.** Main bond lengths (Å) for **S-1** and **R-1**

| Bond lengths (Å) |          |             |          |
|------------------|----------|-------------|----------|
| S-1              |          | R-1         |          |
| Zn(1)-N(1)       | 2.021(6) | Zn(1)-N(1)  | 2.006(4) |
| Zn(1)-O(2)       | 1.941(4) | Zn(1)-O(2)  | 1.934(3) |
| Zn(1)-O(3)       | 1.963(5) | Zn(1)-O(4)  | 1.961(4) |
| Zn(1)-O(4)       | 1.933(5) | Zn(1)-O(5)  | 1.939(4) |
| Zn(2)-O(2)       | 2.420(5) | Zn(2)-O(2)  | 2.419(4) |
| Zn(2)-O(5)       | 2.361(5) | Zn(2)-O(3)  | 2.361(4) |
| Zn(2)-O(6)       | 2.361(6) | Zn(2)-O(6)  | 2.361(4) |
| Zn(2)-O(7)       | 2.428(6) | Zn(2)-O(7)  | 2.426(4) |
| Zn(2)-O(10)      | 2.353(6) | Zn(2)-O(10) | 2.357(4) |
| Zn(2)-O(11)      | 2.428(5) | Zn(2)-O(11) | 2.427(4) |
| Zn(3)-O(8)       | 1.926(6) | Zn(3)-O(8)  | 1.939(4) |
| Zn(3)-O(9)       | 1.944(6) | Zn(3)-O(9)  | 1.950(4) |
| Zn(3)-O(11)      | 1.963(5) | Zn(3)-O(11) | 1.953(4) |
| Zn(3)-N(2)       | 2.027(6) | Zn(3)-N(2)  | 2.020(5) |

**Table S3.** Main bond angles (°) for **S-1** and **R-1**

| Bond angles (°) |            |                  |            |
|-----------------|------------|------------------|------------|
| S-1             |            | R-1              |            |
| O(2)-Zn(1)-N(1) | 96.7(2)    | O(2)-Zn(1)-N(1)  | 96.77(16)  |
| O(2)-Zn(1)-O(3) | 111.0(2)   | O(2)-Zn(1)-O(4)  | 110.60(16) |
| O(4)-Zn(1)-N(1) | 115.0(2)   | O(2)-Zn(1)-O(5)  | 112.72(17) |
| O(4)-Zn(1)-O(2) | 112.3(2)   | O(4)-Zn(1)-N(1)  | 110.02(17) |
| O(4)-Zn(1)-O(3) | 110.7(2)   | O(5)-Zn(1)-N(1)  | 115.49(17) |
| O(3)-Zn(1)-N(1) | 110.5(2)   | O(5)-Zn(1)-O(4)  | 110.55(18) |
| O(2)-Zn(2)-O(7) | 153.35(18) | O(2)-Zn(2)-O(11) | 130.55(13) |

|                   |            |                   |            |
|-------------------|------------|-------------------|------------|
| O(2)-Zn(2)-O(11)  | 130.16(17) | O(2)-Zn(2)-O(7)   | 153.16(13) |
| O(5)-Zn(2)-O(2)   | 75.98(19)  | O(7)-Zn(2)-O(11)  | 74.60(13)  |
| O(5)-Zn(2)-O(7)   | 81.7(2)    | O(3)-Zn(2)-O(11)  | 110.48(14) |
| O(5)-Zn(2)-O(11)  | 151.87(19) | O(3)-Zn(2)-O(2)   | 78.93(13)  |
| O(7)-Zn(2)-O(11)  | 75.00(18)  | O(3)-Zn(2)-O(7)   | 83.13(14)  |
| O(10)-Zn(2)-O(2)  | 108.4(2)   | O(3)-Zn(2)-O(6)   | 82.01(16)  |
| O(10)-Zn(2)-O(5)  | 82.4(2)    | O(6)-Zn(2)-O(11)  | 150.73(14) |
| O(10)-Zn(2)-O(7)  | 82.5(2)    | O(6)-Zn(2)-O(2)   | 76.81(14)  |
| O(10)-Zn(2)-O(11) | 79.20(19)  | O(6)-Zn(2)-O(7)   | 81.08(14)  |
| O(10)-Zn(2)-O(6)  | 160.2(2)   | O(10)-Zn(2)-O(11) | 79.49(13)  |
| O(6)-Zn(2)-O(2)   | 79.37(17)  | O(10)-Zn(2)-O(2)  | 108.64(14) |
| O(6)-Zn(2)-O(5)   | 82.0(2)    | O(10)-Zn(2)-O(7)  | 82.61(15)  |
| O(6)-Zn(2)-O(7)   | 83.3(2)    | O(10)-Zn(2)-O(3)  | 159.63(15) |
| O(6)-Zn(2)-O(11)  | 110.24(19) | O(10)-Zn(2)-O(6)  | 81.48(16)  |
| O(8)-Zn(3)-O(11)  | 112.2(2)   | O(11)-Zn(3)-N(2)  | 95.05(17)  |
| O(8)-Zn(3)-O(9)   | 110.0(3)   | O(9)-Zn(3)-N(2)   | 107.7(2)   |
| O(8)-Zn(3)-N(2)   | 115.9(3)   | O(9)-Zn(3)-O(11)  | 115.55(17) |
| O(11)-Zn(3)-N(2)  | 95.2(2)    | O(8)-Zn(3)-N(2)   | 115.63(18) |
| O(9)-Zn(3)-O(11)  | 115.3(2)   | O(8)-Zn(3)-O(11)  | 112.30(17) |
| O(9)-Zn(3)-N(2)   | 107.6(3)   | O(8)-Zn(3)-O(9)   | 110.0(2)   |

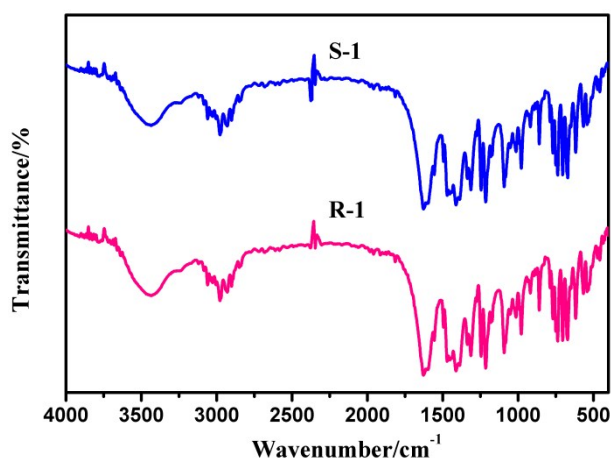

**Fig.S1** IR spectra for **S-1** and **R-1** at RT in KBr pellets

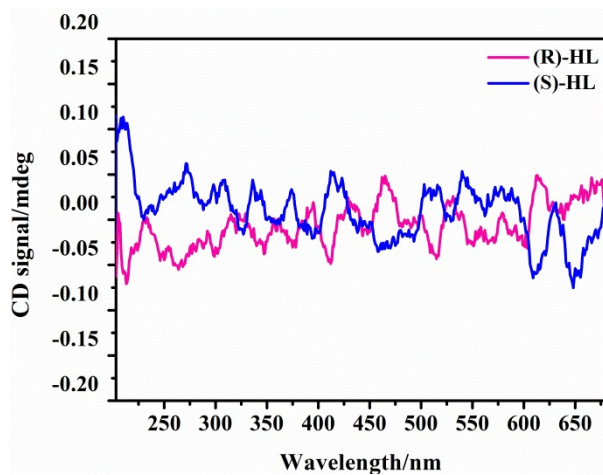

Fig. S2 CD spectra for (R)-HL and (S)-HL solution ( $1 \times 10^{-2}$  mmol/mL,  $\text{CH}_3\text{OH}$ )

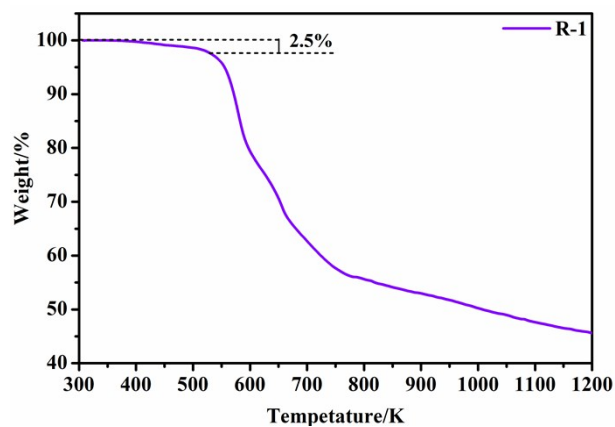

Fig.S3 Thermogravimetric curves for R-1

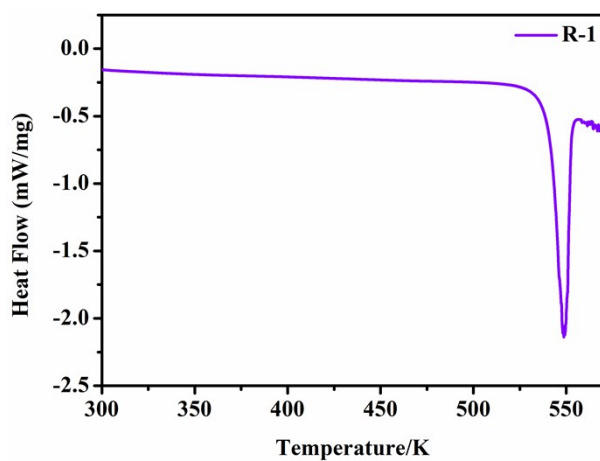

Fig.S4 DSC curves for R-1

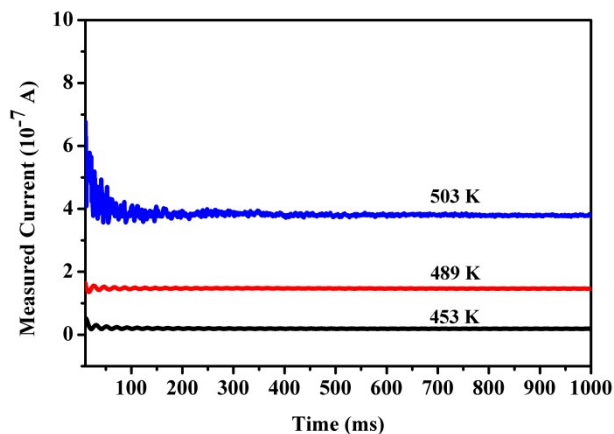

Fig.S5 The leakage current for R-1 at 1200 V under different temperature

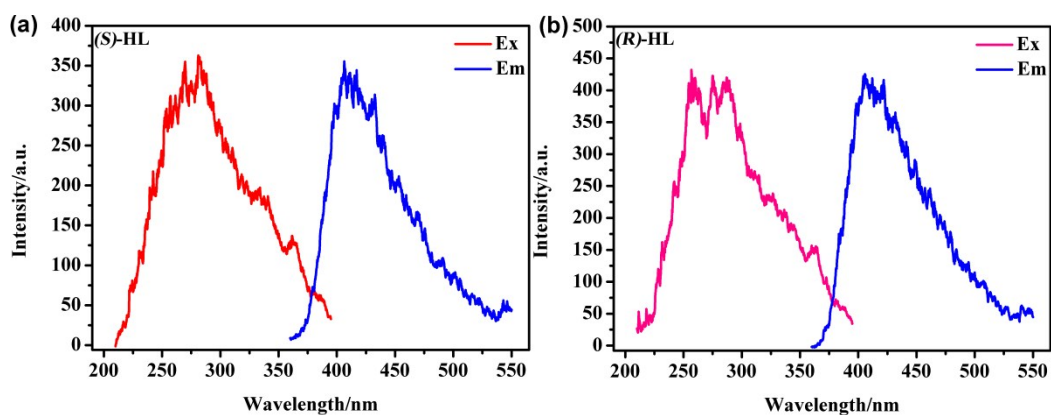

Fig.S6 The fluorescence spectra of (R)-HL (a) and (R)-HL (b) at room temperature ( $1 \times 10^{-5}$  M)

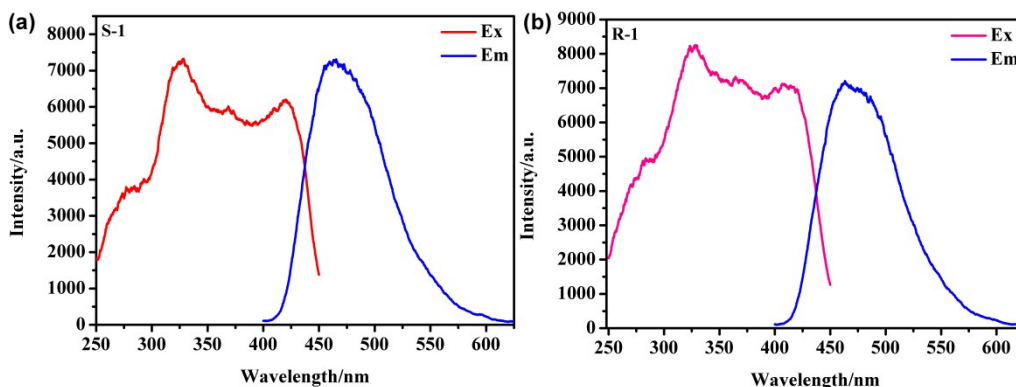

Fig.S7 The solid-state fluorescence spectra of S-1 (a) and R-1 (b) at room temperature

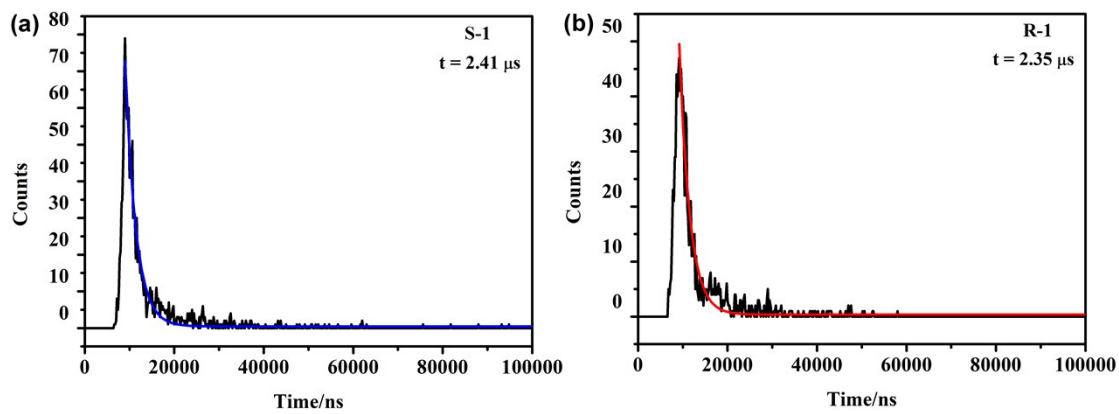

**Fig.S8** The fluorescent lifetime for **S-1** and **R-1**
